# Supplementary material
Source: publisher figshare collection journal article supplement (https://acs.figshare.com/ndownloader/files/4403065)

## Supporting Information for

Z-Selective and Syndioselective Ring-Opening Metathesis Polymerization  
(ROMP) Initiated by MonoAryloxidePyrrolide (MAP) Catalysts.

by

Margaret M. Flook, Laura C. H. Gerber, G. Debelouchina, and Richard R. Schrock\*

**Figure 1S.** IR spectra (KBr pellet) of poly-NBDF9(100) made from initiators **1**, **2a**, and **3b**.

**Figure 2S.**  $^{13}\text{C}$  CPMAS NMR spectrum of polyNBDF9<sub>1</sub>.

**Figure 3S.** Solid and solution state  $^{13}\text{C}$  NMR spectra of polyNBDF6 obtained with initiators **3b** and **2a**.

**Figure 4S.** IR spectra (thin film) of polyMPCP(100) made from initiators **1**, **2a**, and **3a**.

**Figure 1S.** IR spectra (KBr pellet) of poly-NBDF9(100) made from initiators **1**, **2a**, and **3b**. Absorption at  $970\text{ cm}^{-1}$ , which signifies *trans* olefins, is present only in spectrum marked "**2a**".

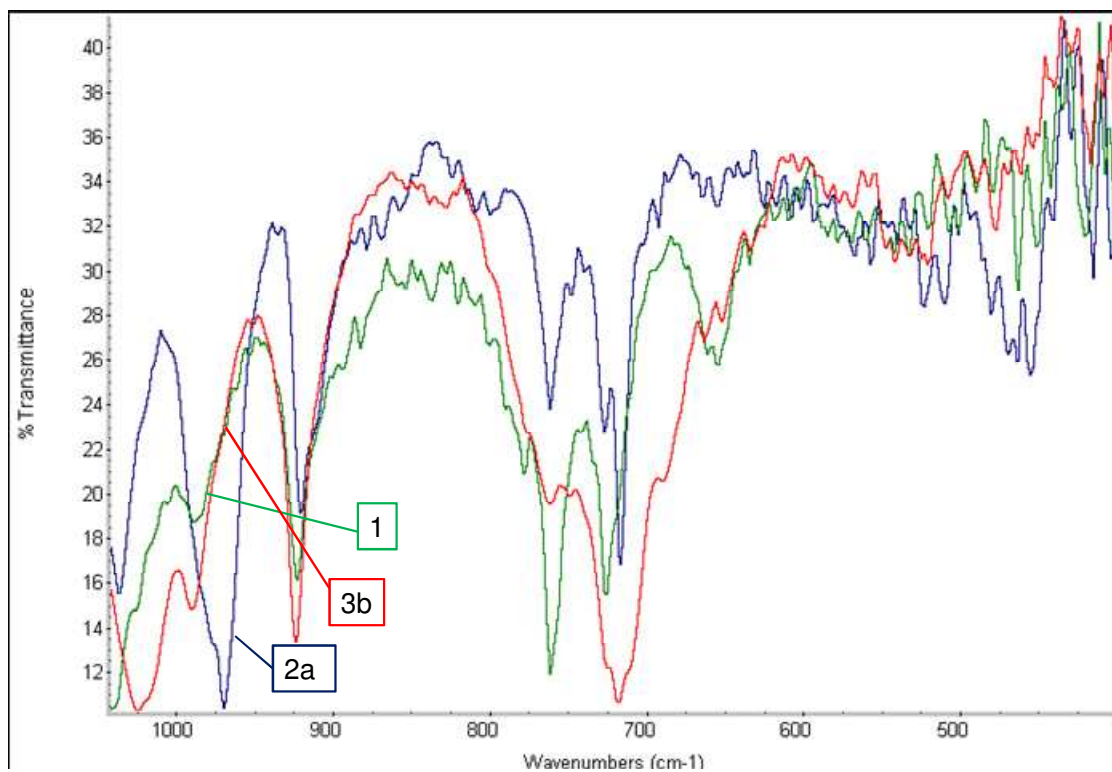

**Figure 2S.**  $^{13}\text{C}$  CPMAS NMR spectrum of polyNBDF9<sub>1</sub>. Recorded at 274 K on a 900 MHz (proton) instrument spinning at 16 kHz. Peaks around 60, 70, 200, and 210 ppm were determined to be spinning side bands.

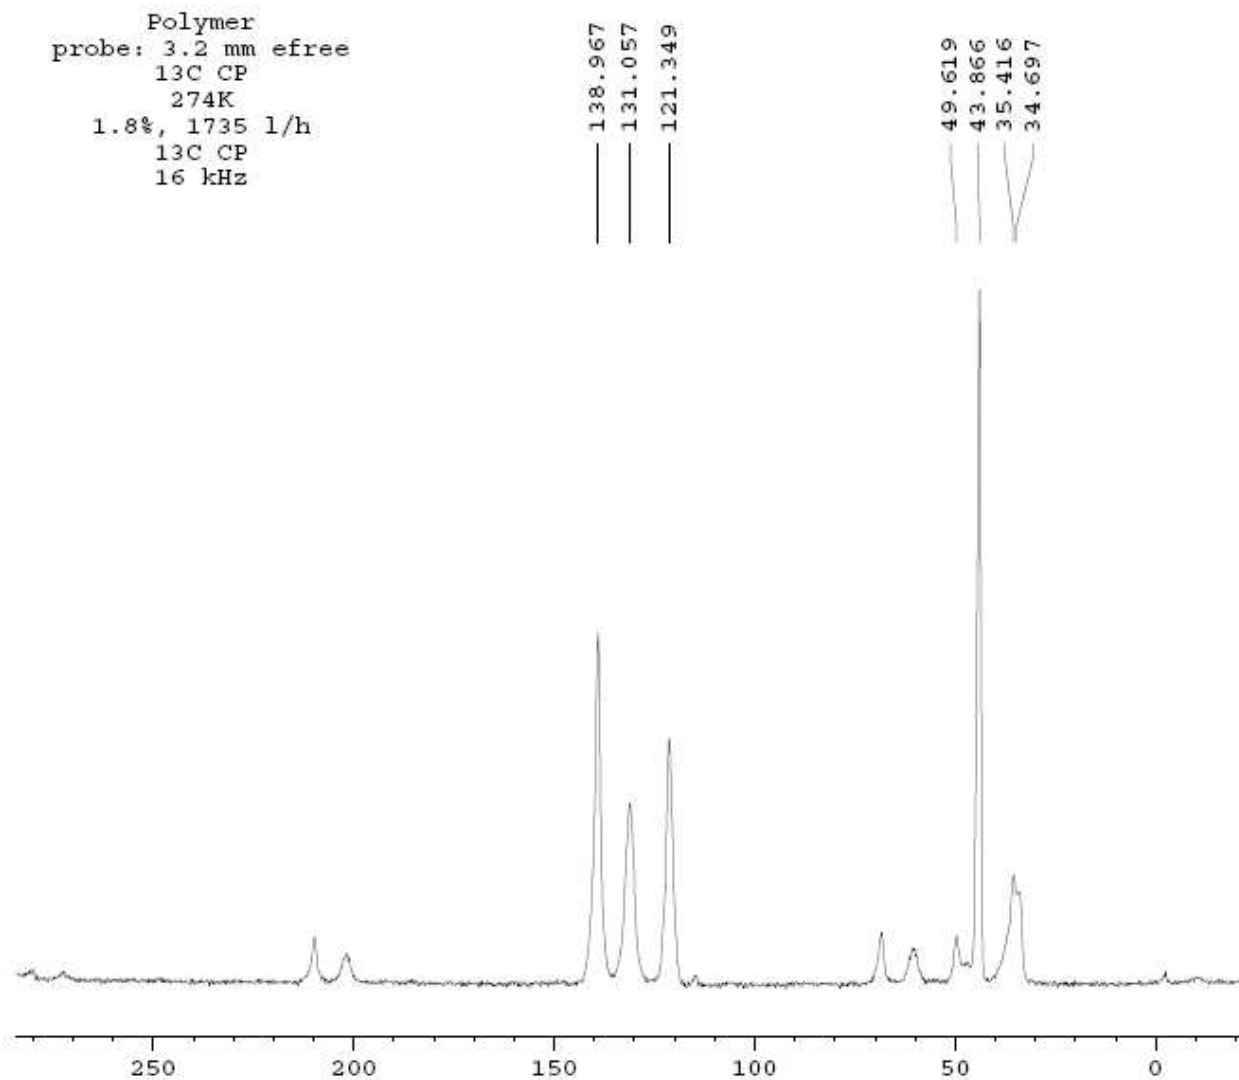

**Figure 3S.** Solid and solution state  $^{13}\text{C}$  NMR spectra of polyNBDF6 obtained with initiators **3b** and **2a**. Recorded at 274 K on a 900 MHz (proton) instrument spinning at 16 kHz. Peaks around 60, 70, 200, and 210 ppm were determined to be spinning side bands.

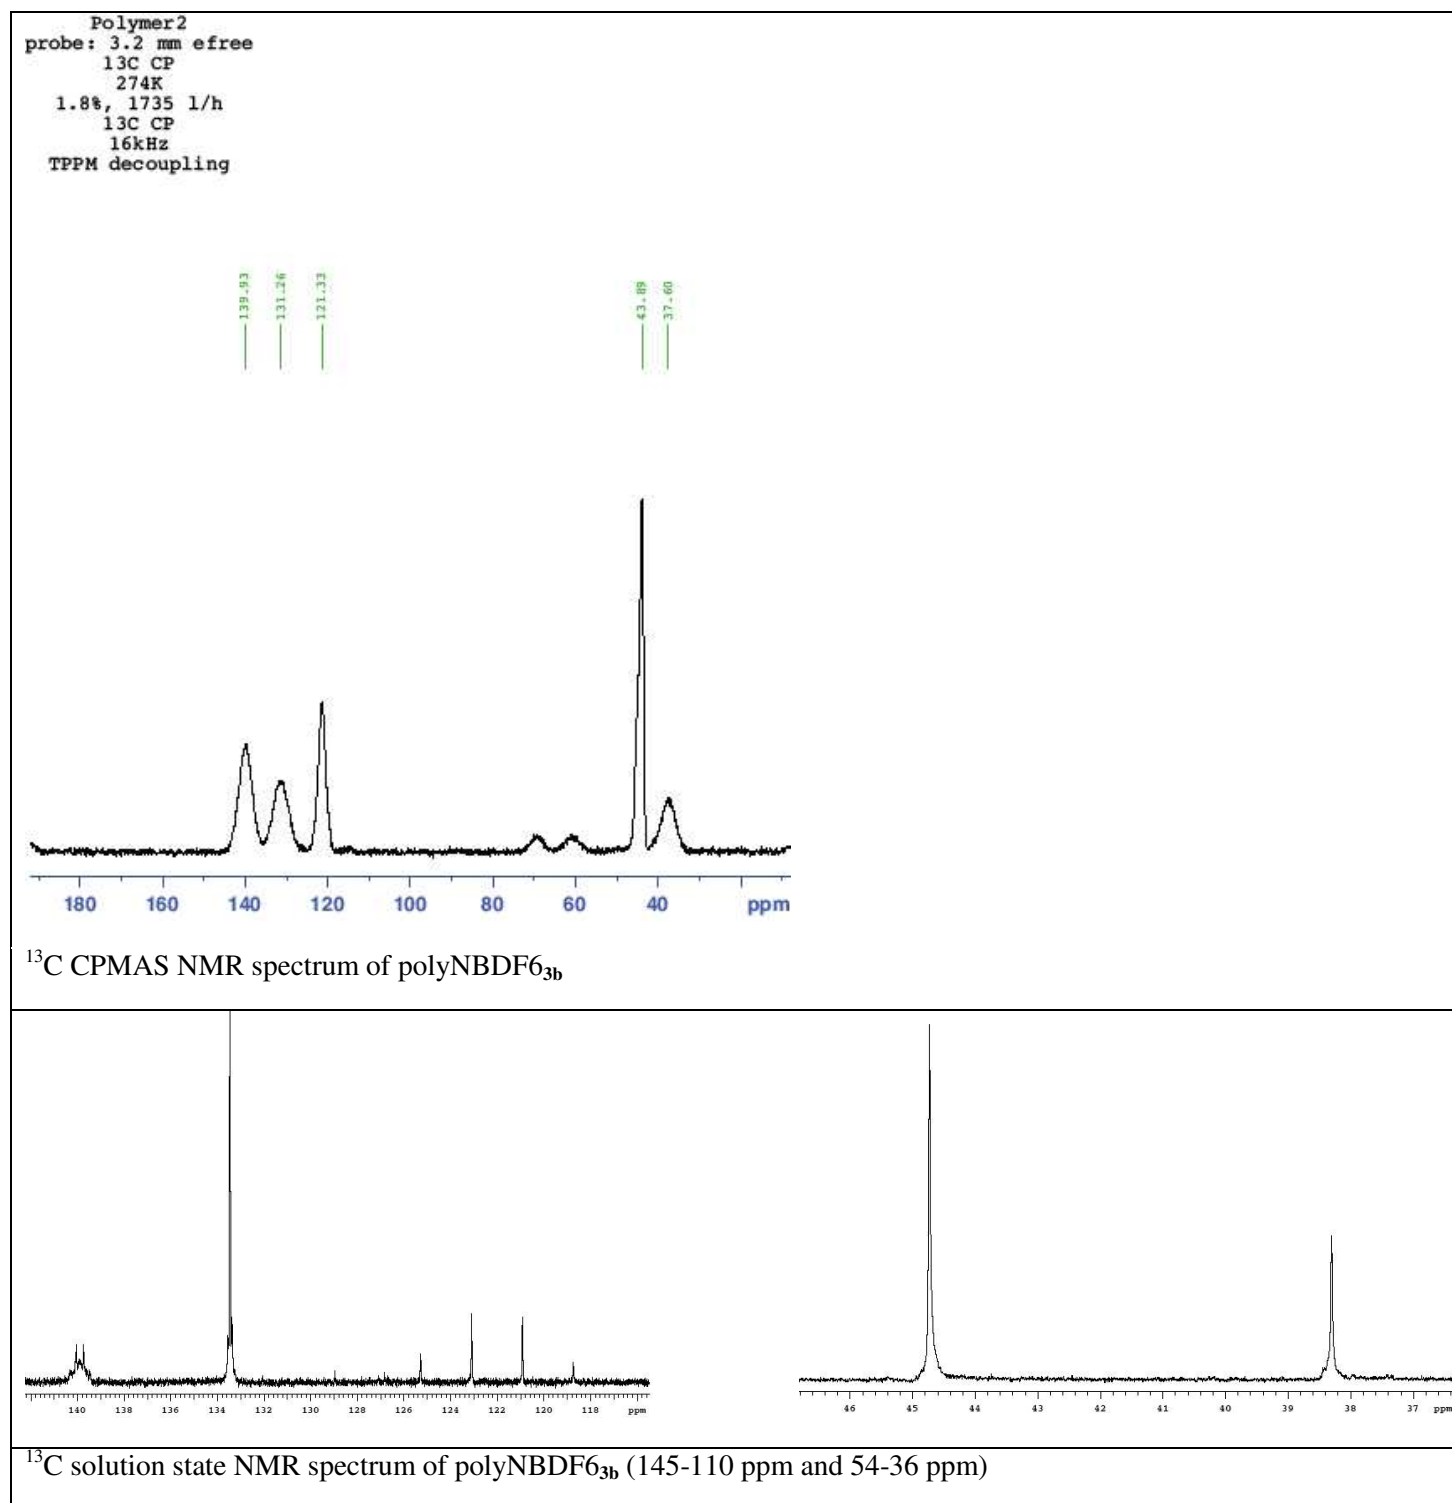

Polymer3  
13C CP  
16kHz  
TPPM decoupling  
1536 scans

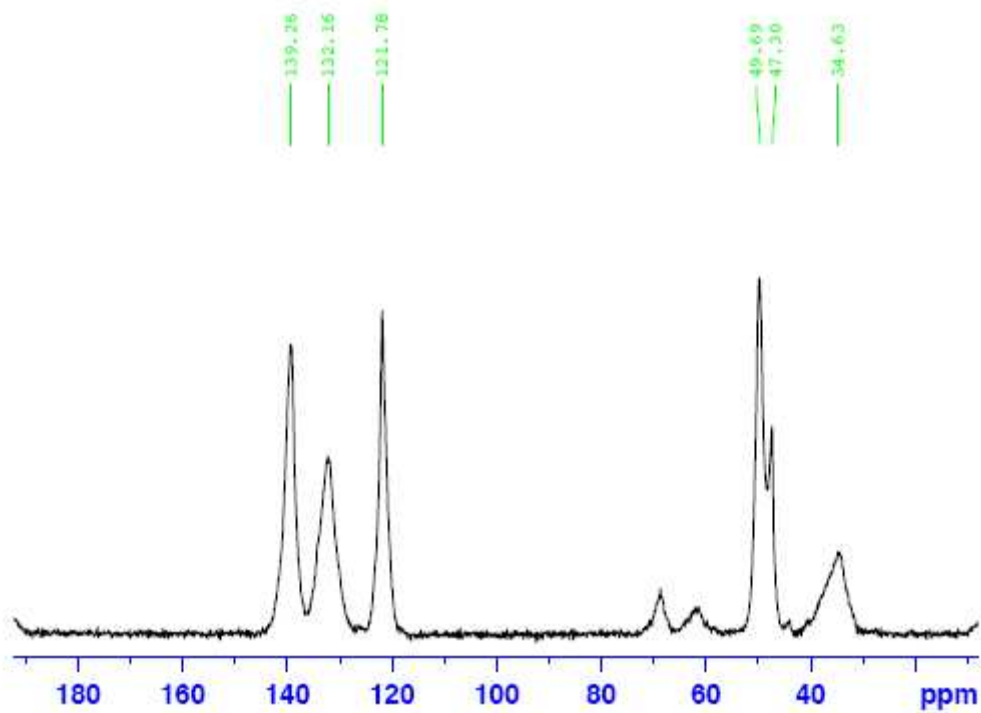

$^{13}\text{C}$  CPMAS NMR spectrum of polyNBDF<sub>6</sub><sub>2a</sub>

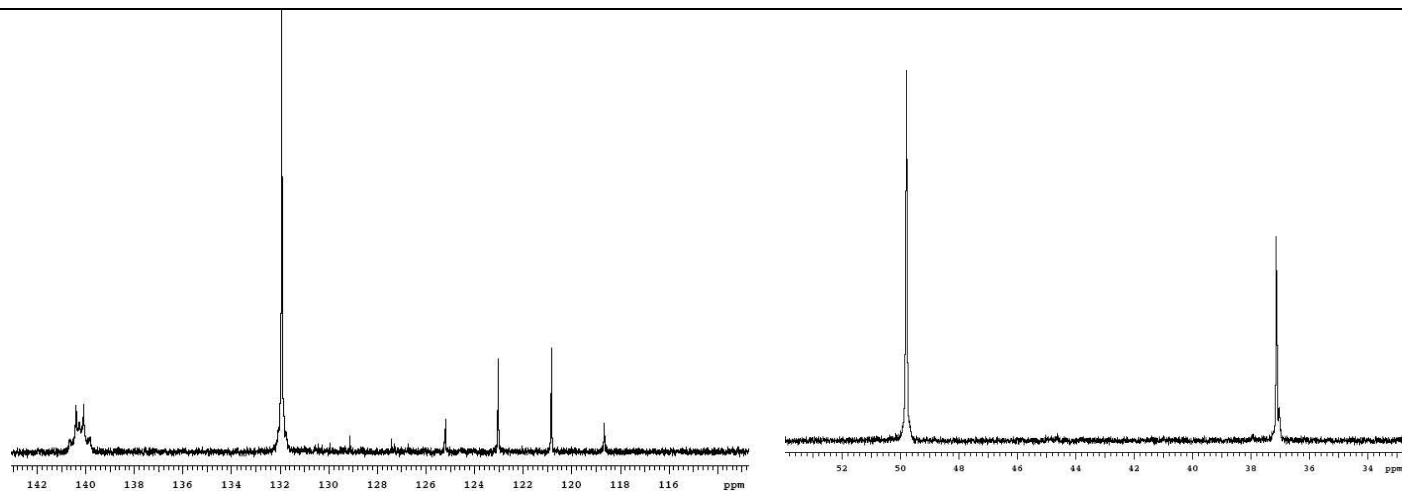

$^{13}\text{C}$  solution state NMR spectrum of polyNBDF<sub>6</sub><sub>2a</sub> (145-110 ppm and 54-36 ppm)

**Figure 4S.** IR spectra (thin film) of polyMPCP(100) made from initiators **1**, **2a**, and **3a**. Absorption at  $984\text{ cm}^{-1}$ , which signifies *trans* olefins, is present only in spectrum marked "2a".

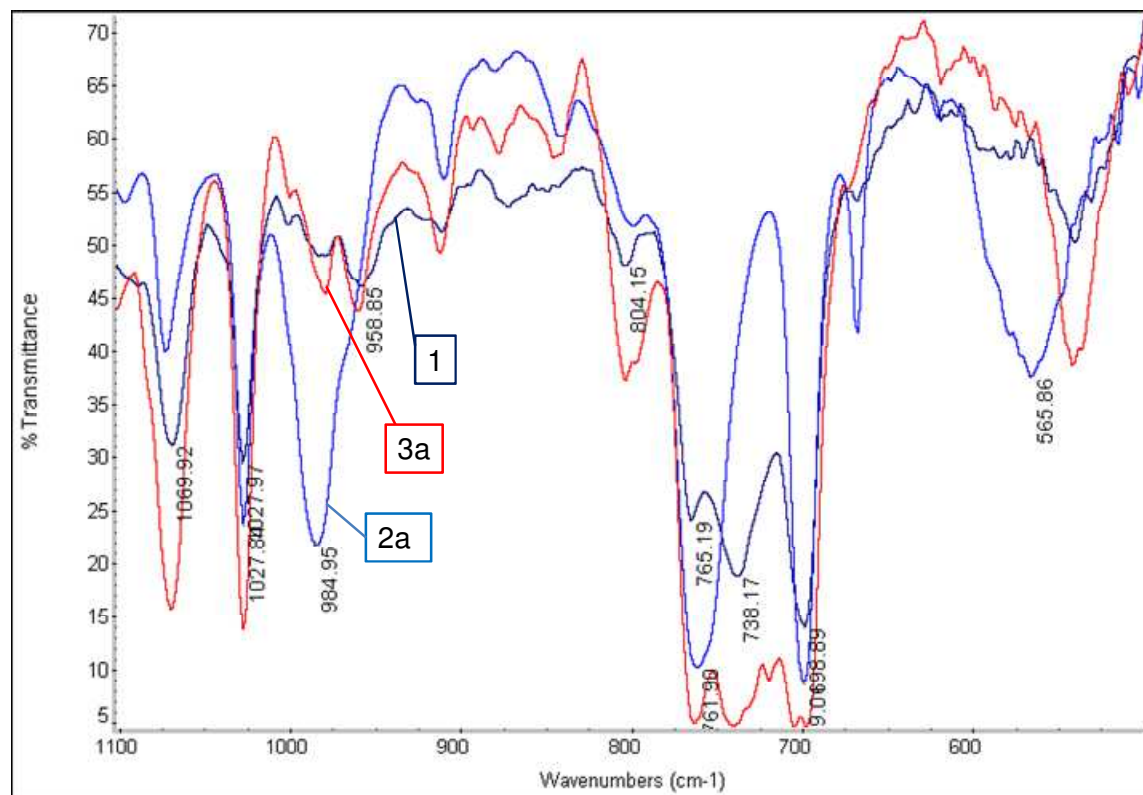

Supplement: Supplementary file 1 [file 4403065]
